# Supplementary material for: Specific Proton-Donor Properties of Glycine Betaine. Metric Parameters and Enthalpy of Noncovalent Interactions in its Dimer, Water Complexes and Crystalline Hydrate
Source: MDPI journal article supplement (doi:10.3390/ijms241612971), 2023-08-19
Supplement: s1 [file s1]

**Specific proton-donor properties of glycine betaine. Metric parameters and enthalpy of noncovalent interactions in its dimer, water complexes and crystalline hydrate.**

Nikita E. Frolov <sup>a)</sup>, Anastasia V. Shishkina <sup>b)</sup>, Mikhail V. Vener <sup>\*c)</sup>

*<sup>a)</sup> V. M. Gorbatov Federal Research Center for Food Systems, Talalikhina St. 26, Moscow 109316, Russia; frolovne24@gmail.com*

*<sup>b)</sup> Northern (Arctic) Federal University, Severnaya Dvina Emb. 17, Arkhangelsk 163001, Russia; a.shishkina@narfu.ru*

*<sup>c)</sup> Kurnakov Institute of General and Inorganic Chemistry, Russian Academy of Sciences, Leninskii prosp. 31, Moscow 119991, Russia; vener@igic.ras.ru*

*\*Correspondence: vener@igic.ras.ru;*

**Table S1.** H $\cdots$ O distances  $R(\text{H}\cdots\text{O})$  in global-minimum structures of complexes of GB with water, calculated using the B3LYP/6-31G\*\* level (A). Also shown are the H $\cdots$ O distances calculated by B3LYP/6-311++G\*\* (B) and wB97XD/aug-cc-pVDZ (C) for similar structures. Intermolecular H-bond enthalpies are estimated according to equation 1.

| GB•(H <sub>2</sub> O)              |                                         |       |       |                                        |       |       |
|------------------------------------|-----------------------------------------|-------|-------|----------------------------------------|-------|-------|
| Fragment <sup>(a)</sup>            | $R(\text{H}\cdots\text{O}), \text{\AA}$ |       |       | $-\Delta H_{\text{HB}}, \text{kJ/mol}$ |       |       |
|                                    | A                                       | B     | C     | A                                      | B     | C     |
| O–H21...O5                         | 1.753                                   | 1.757 | 1.709 | 27.1                                   | 26.9  | 29.3  |
| C–H12...O20                        | 2.272                                   | 2.368 | 2.246 | 12.3                                   | 10.8  | 12.7  |
| C–H2...O20                         | 2.288                                   | 2.365 | 2.328 | 12.1                                   | 10.9  | 11.4  |
| Total enthalpy                     |                                         |       |       | 51.5                                   | 48.6  | 53.4  |
| GB•(H <sub>2</sub> O) <sub>2</sub> |                                         |       |       |                                        |       |       |
| Fragment <sup>(a)</sup>            | $R(\text{H}\cdots\text{O}), \text{\AA}$ |       |       | $-\Delta H_{\text{HB}}, \text{kJ/mol}$ |       |       |
|                                    | A                                       | B     | C     | A                                      | B     | C     |
| O–H21...O5                         | 1.736                                   | 1.740 | 1.730 | 27.9                                   | 27.8  | 28.3  |
| O–H25...O19                        | 1.736                                   | 1.740 | 1.712 | 27.9                                   | 27.8  | 29.2  |
| C–H17...O23                        | 2.218                                   | 2.284 | 2.208 | 13.2                                   | 12.1  | 13.4  |
| C–H12...O20                        | 2.219                                   | 2.282 | 2.332 | 13.2                                   | 12.1  | 11.4  |
| C–H3...O23                         | 2.304                                   | 2.454 | 2.364 | 11.8                                   | 9.7   | 10.9  |
| C–H2...O20                         | 2.303                                   | 2.451 | 2.450 | 11.8                                   | 9.8   | 9.8   |
| Total enthalpy                     |                                         |       |       | 105.8                                  | 99.3  | 103.0 |
| GB•(H <sub>2</sub> O) <sub>3</sub> |                                         |       |       |                                        |       |       |
| Fragment <sup>(a)</sup>            | $R(\text{H}\cdots\text{O}), \text{\AA}$ |       |       | $-\Delta H_{\text{HB}}, \text{kJ/mol}$ |       |       |
|                                    | A                                       | B     | C     | A                                      | B     | C     |
| O–H28...O23                        | 1.724                                   | 1.760 | 1.742 | 28.6                                   | 26.8  | 27.7  |
| O–H22...O26                        | 1.847                                   | 1.896 | 1.906 | 23.1                                   | 21.4  | 21.0  |
| O–H24...O5                         | 1.978                                   | 2.646 | 2.358 | 18.8                                   | 7.7   | 11.0  |
| O–H25...O19                        | 1.990                                   | 1.804 | 1.836 | 18.4                                   | 24.9  | 23.6  |
| O–H21...O5                         | 2.040                                   | 2.164 | 2.021 | 17.1                                   | 14.3  | 17.6  |
| C–H12...O20                        | 2.282                                   | 2.407 | 2.368 | 12.1                                   | 10.3  | 10.8  |
| C–H2...O20                         | 2.471                                   | 2.588 | 2.510 | 9.5                                    | 8.3   | 9.1   |
| C–H12...O26                        | 2.914                                   | 3.362 | 2.862 | 5.8                                    | 3.7   | 6.1   |
| Total enthalpy                     |                                         |       |       | 133.4                                  | 117.4 | 126.9 |
| GB•(H <sub>2</sub> O) <sub>4</sub> |                                         |       |       |                                        |       |       |
| Fragment <sup>(a)</sup>            | $R(\text{H}\cdots\text{O}), \text{\AA}$ |       |       | $-\Delta H_{\text{HB}}, \text{kJ/mol}$ |       |       |
|                                    | A                                       | B     | C     | A                                      | B     | C     |
| O–H27...O5                         | 1.789                                   | 1.796 | 1.758 | 25.5                                   | 25.2  | 26.9  |
| O–H25...O20                        | 1.827                                   | 1.951 | 1.885 | 23.9                                   | 19.6  | 21.7  |
| O–H22...O29                        | 1.913                                   | 2.091 | 2.049 | 21.9                                   | 15.8  | 16.9  |
| O–H30...O19                        | 1.881                                   | 1.744 | 1.721 | 20.8                                   | 27.6  | 28.7  |
| O–H21...O5                         | 1.942                                   | 1.909 | 1.852 | 19.9                                   | 20.9  | 22.9  |
| O–H24...O19                        | 2.002                                   | 3.297 | 3.141 | 18.1                                   | 4.0   | 4.6   |
| C–H13...O23                        | 2.126                                   | 2.160 | 2.408 | 15.1                                   | 14.4  | 10.3  |
| C–H12...O26                        | 2.222                                   | 2.340 | 2.251 | 13.2                                   | 11.2  | 12.7  |
| C–H2...O26                         | 2.244                                   | 2.332 | 2.337 | 12.8                                   | 11.4  | 11.3  |
| Total enthalpy                     |                                         |       |       | 171.2                                  | 150.1 | 156.0 |
| GB•(H <sub>2</sub> O) <sub>5</sub> |                                         |       |       |                                        |       |       |

| Fragment <sup>a)</sup> | $R(\text{H}\cdots\text{O}), \text{\AA}$ |       |       | $-\Delta H_{\text{HB}}, \text{kJ/mol}$ |       |       |
|------------------------|-----------------------------------------|-------|-------|----------------------------------------|-------|-------|
|                        | A                                       | B     | C     | A                                      | B     | C     |
| O–H25...O20            | 1.819                                   | 1.938 | 1.891 | 24.2                                   | 20.0  | 21.5  |
| O–H27...O5             | 1.812                                   | 1.812 | 1.785 | 24.5                                   | 24.5  | 25.7  |
| O–H33...O19            | 1.825                                   | 1.803 | 1.782 | 24.0                                   | 24.9  | 25.8  |
| O–H22...O29            | 1.897                                   | 2.089 | 2.060 | 21.3                                   | 15.9  | 16.6  |
| O–H30...O19            | 1.868                                   | 1.779 | 1.750 | 22.4                                   | 25.9  | 27.3  |
| O–H21...O5             | 1.960                                   | 1.901 | 1.861 | 19.3                                   | 21.2  | 22.6  |
| O–H24...O19            | 2.084                                   | 3.330 | 3.192 | 16.0                                   | 3.8   | 4.4   |
| C–H12...O26            | 2.210                                   | 2.328 | 2.266 | 13.4                                   | 11.4  | 12.4  |
| C–H2...O26             | 2.268                                   | 2.415 | 2.358 | 12.4                                   | 10.2  | 11.0  |
| C–H3...O32             | 2.300                                   | 2.384 | 2.383 | 11.8                                   | 10.6  | 10.6  |
| C–H17...O32            | 2.281                                   | 2.325 | 2.287 | 12.2                                   | 11.5  | 12.1  |
| C–H16...O23            | 2.285                                   | 2.232 | 2.255 | 12.1                                   | 13.0  | 12.6  |
| C–H13...O23            | 2.336                                   | 2.799 | 2.409 | 11.3                                   | 6.5   | 10.3  |
| Total enthalpy         |                                         |       |       | 224.9                                  | 199.4 | 212.9 |
|                        |                                         |       |       |                                        |       |       |

<sup>a)</sup> the numbering of atoms is shown on Figures 1, 2 and 3.

**Table S2.** H $\cdots$ O distances  $R(\text{H}\cdots\text{O})$  in structures of GB $\cdot$ (H<sub>2</sub>O) complexes <sup>a)</sup>, calculated using B3LYP/6-31G\*\* and intermolecular H-bond enthalpy/energy, computed using Eqs. (1) and (2).

| Local minimum structure GB H <sub>2</sub> O 2 ( $E = -478.577416/-478.729306/-$ <b>478.498812</b> a.u.) <sup>b)</sup> |                                         |                                        |                                 |
|-----------------------------------------------------------------------------------------------------------------------|-----------------------------------------|----------------------------------------|---------------------------------|
| Fragment                                                                                                              | $R(\text{H}\cdots\text{O}), \text{\AA}$ | $-\Delta H_{\text{HB}}, \text{kJ/mol}$ | $E_{\text{int}}, \text{kJ/mol}$ |
| O-H21...O19                                                                                                           | 1.974                                   | 18.9                                   | 22.4                            |
| O-H22...O5                                                                                                            | 2.204                                   | 13.5                                   | 14.8                            |
| C-H13...O20                                                                                                           | 2.180                                   | 14.0                                   | 14.3                            |
| Total enthalpy/energy, kJ/mol                                                                                         |                                         | 46.4                                   | 51.5                            |
| Global minimum structure GB H <sub>2</sub> O 1 ( $E = -478.581047/-478.730139/-$ <b>478.500944</b> a.u.)              |                                         |                                        |                                 |
| Fragment                                                                                                              | $R(\text{H}\cdots\text{O}), \text{\AA}$ | $-\Delta H_{\text{HB}}, \text{kJ/mol}$ | $E_{\text{int}}, \text{kJ/mol}$ |
| O-H21...O5                                                                                                            | 1.753                                   | 27.1                                   | 32.8                            |
| C-H12...O20                                                                                                           | 2.272                                   | 12.3                                   | 12.6                            |
| C-H2...O20                                                                                                            | 2.288                                   | 12.1                                   | 13.3                            |
| Total enthalpy/energy, kJ/mol                                                                                         |                                         | 51.5                                   | 58.7                            |
| Local minimum structure GB H <sub>2</sub> O 3 ( $E = -478.576123/-478.730077/-$ <b>478.501136</b> a.u.) <sup>a)</sup> |                                         |                                        |                                 |
| Fragment                                                                                                              | $R(\text{H}\cdots\text{O}), \text{\AA}$ | $-\Delta H_{\text{HB}}, \text{kJ/mol}$ | $E_{\text{int}}, \text{kJ/mol}$ |
| O-H22...O19                                                                                                           | 1.900                                   | 21.2                                   | 24.2                            |
| C-H17...O20                                                                                                           | 2.506                                   | 9.1                                    | 8.9                             |
| C-H3...O20                                                                                                            | 2.794                                   | 6.5                                    | 5.8                             |
| Total enthalpy/energy, kJ/mol                                                                                         |                                         | 36.8                                   | 38.9                            |

<sup>a)</sup> See Figs. 1 and S1.

<sup>b)</sup> Sum of electronic and zero-point energies computed at the B3LYP/6-31G\*\* level. Energies computed at the B3LYP/6-311++G\*\* level are given by script and at the wB97XD/aug-cc-pVDZ level highlighted in bold.

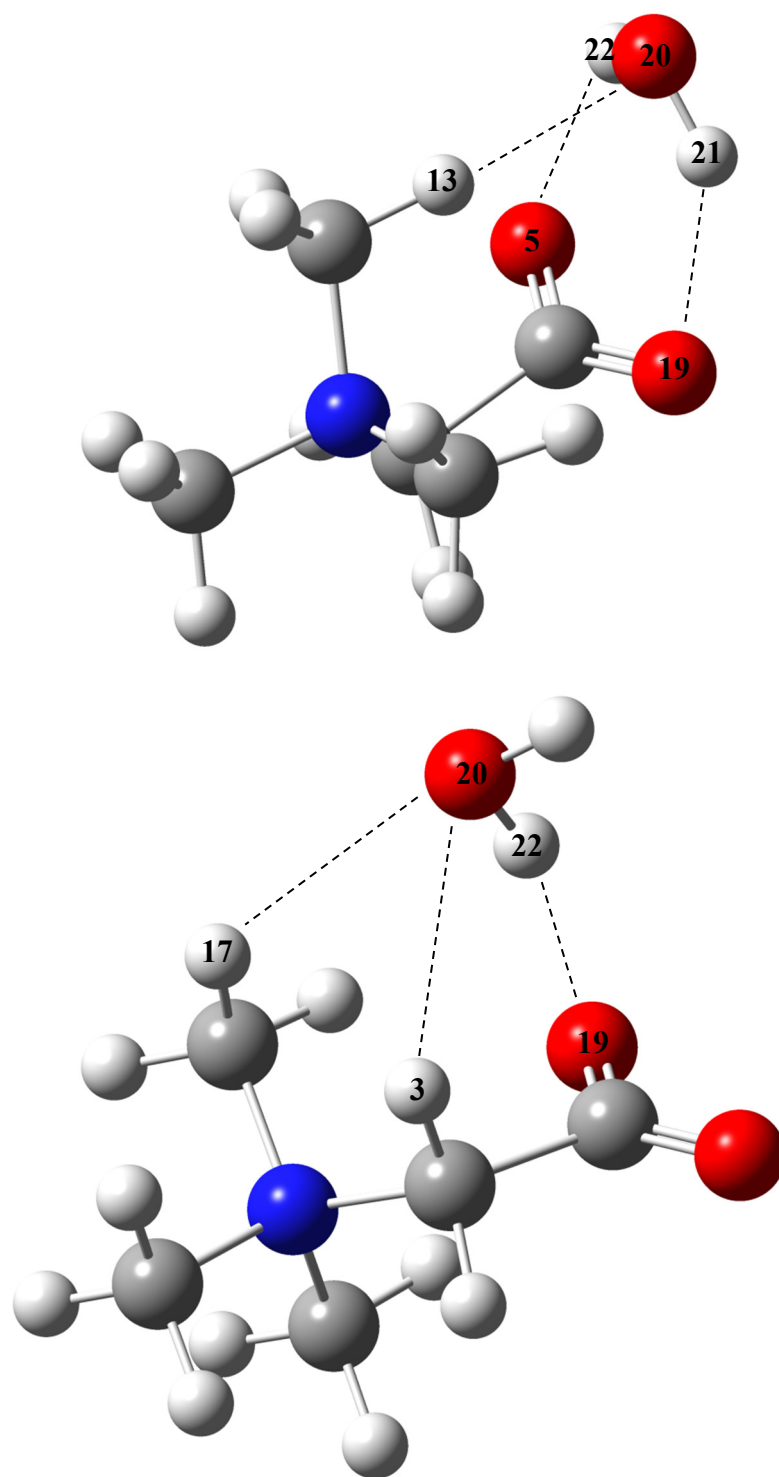

**Figure S1.** The local-minimum structures GB•(H<sub>2</sub>O) complexes: GB\_H2O\_2 (upper panel) and GB\_H2O\_3 (lower panel). H-bonds are given by dotted lines.

**Table S3.** H $\cdots$ O distances  $R(\text{H}\cdots\text{O})$  in structures of GB $\cdot(\text{H}_2\text{O})_2$  complexes<sup>a)</sup>, calculated using B3LYP/6-31G\*\* and intermolecular H-bond enthalpy/energy, computed using Eqs. (1) and (2).

| Local minimum structure GB 2H2O (E = -554.993511/-555.180032/- <b>554.912438</b> a.u.) <sup>a)</sup> |                                 |                                  |                           |
|------------------------------------------------------------------------------------------------------|---------------------------------|----------------------------------|---------------------------|
| Fragment                                                                                             | $R(\text{H}\cdots\text{O})$ , Å | $-\Delta H_{\text{HB}}$ , kJ/mol | $E_{\text{int}}$ , kJ/mol |
| O-H21...O5                                                                                           | 1.875                           | 22.1                             | 24.2                      |
| O-H24...O19                                                                                          | 1.944                           | 19.8                             | 21.1                      |
| O-H25...O20                                                                                          | 2.086                           | 16.0                             | 20.0                      |
| Total enthalpy/energy, kJ/mol                                                                        |                                 | 57.9                             | 65.3                      |

| Global minimum structure GB 2H2O 1 (E = -554.999226/-555.181925/- <b>554.917030</b> a.u.) <sup>a)</sup> |                                 |                                  |                           |
|---------------------------------------------------------------------------------------------------------|---------------------------------|----------------------------------|---------------------------|
| Fragment                                                                                                | $R(\text{H}\cdots\text{O})$ , Å | $-\Delta H_{\text{HB}}$ , kJ/mol | $E_{\text{int}}$ , kJ/mol |
| O-H21...O5                                                                                              | 1.736                           | 27.9                             | 34.6                      |
| O-H25...O19                                                                                             | 1.736                           | 27.9                             | 34.6                      |
| C-H17...O23                                                                                             | 2.218                           | 13.2                             | 13.8                      |
| C-H12...O20                                                                                             | 2.219                           | 13.2                             | 13.7                      |
| C-H3...O23                                                                                              | 2.304                           | 11.8                             | 12.9                      |
| C-H2...O20                                                                                              | 2.303                           | 11.8                             | 12.9                      |
| Total enthalpy/energy, kJ/mol                                                                           |                                 | 105.8                            | 122.5                     |

| Local minimum structure GB 2H2O 2 (E = -554.997421/-555.178619/- <b>554.912893</b> a.u.) <sup>a)</sup> |                                 |                                  |                           |
|--------------------------------------------------------------------------------------------------------|---------------------------------|----------------------------------|---------------------------|
| Fragment                                                                                               | $R(\text{H}\cdots\text{O})$ , Å | $-\Delta H_{\text{HB}}$ , kJ/mol | $E_{\text{int}}$ , kJ/mol |
| O-H25...O5                                                                                             | 1.856                           | 22.8                             | 26.0                      |
| O-H21...O5                                                                                             | 1.971                           | 19.0                             | 22.0                      |
| O-H22...O23                                                                                            | 1.985                           | 18.6                             | 21.6                      |
| C-H12...O20                                                                                            | 2.236                           | 12.9                             | 13.4                      |
| C-H2...O20                                                                                             | 2.573                           | 8.4                              | 9.4                       |
| Total enthalpy/energy, kJ/mol                                                                          |                                 | 81.7                             | 92.4                      |

<sup>a)</sup> See Figs. 1 and S2.

<sup>b)</sup> Sum of electronic and zero-point energies computed at the B3LYP/6-31G\*\* level. Energies computed at the B3LYP/6-311++G\*\* level are given by script and at the wB97XD/aug-cc-pVDZ level highlighted in bold.

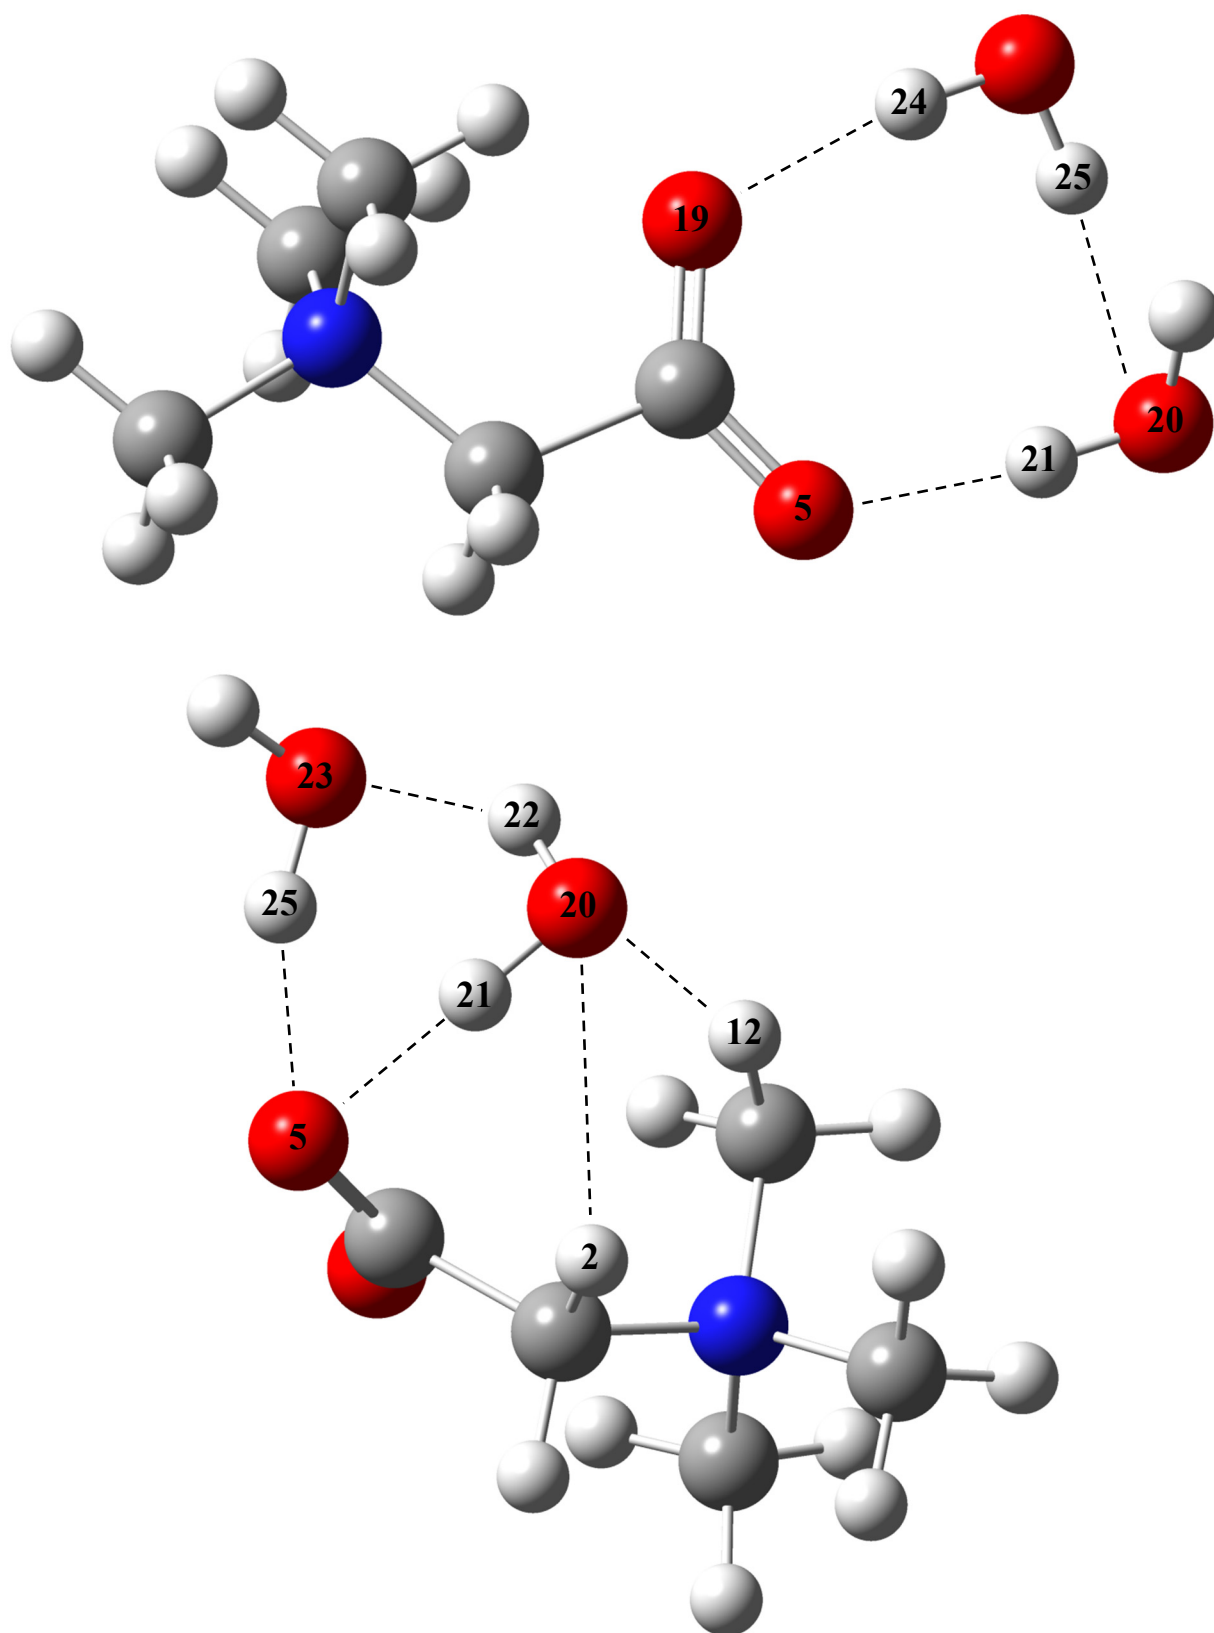

**Figure S2.** The local-minimum structures GB•(H<sub>2</sub>O)<sub>2</sub> complexes: GB\_2H<sub>2</sub>O (upper panel) and GB\_2H<sub>2</sub>O\_2 (lower panel). H-bonds are given by dotted lines.

**Table S4.** H $\cdots$ O distances  $R(\text{H}\cdots\text{O})$  in structures of GB•(H<sub>2</sub>O)<sub>3</sub> complexes <sup>a)</sup>, calculated using B3LYP/6-31G\*\* and intermolecular H-bond enthalpy/energy, computed using Eqs. (1) and (2).

| Local minimum structure GB_3H2O_1 ( $E = -631.419152/-631.632731/-\mathbf{631.329613}$ a.u.) |                                         |                                        |                                 |
|----------------------------------------------------------------------------------------------|-----------------------------------------|----------------------------------------|---------------------------------|
| Fragment                                                                                     | $R(\text{H}\cdots\text{O}), \text{\AA}$ | $-\Delta H_{\text{HB}}, \text{kJ/mol}$ | $E_{\text{int}}, \text{kJ/mol}$ |
| O-H27...O5                                                                                   | 1.780                                   | 25.9                                   | 31.2                            |
| O-H21...O5                                                                                   | 1.778                                   | 26.0                                   | 30.8                            |
| O-H25...O20                                                                                  | 1.898                                   | 21.3                                   | 25.2                            |
| O-H24...O19                                                                                  | 1.954                                   | 19.5                                   | 22.1                            |
| C-H13...O23                                                                                  | 2.117                                   | 15.3                                   | 16.3                            |
| C-H12...O26                                                                                  | 2.233                                   | 12.2                                   | 13.7                            |
| C-H2...O26                                                                                   | 2.277                                   | 13.0                                   | 13.0                            |
| Total enthalpy/energy, kJ/mol                                                                |                                         | 133.2                                  | 152.3                           |

| Global minimum structure GB_3H2O_1 ( $E = -631.423312/-631.634229/-\mathbf{631.329407}$ a.u.) <sup>a)</sup> |                                         |                                        |                                 |
|-------------------------------------------------------------------------------------------------------------|-----------------------------------------|----------------------------------------|---------------------------------|
| Fragment                                                                                                    | $R(\text{H}\cdots\text{O}), \text{\AA}$ | $-\Delta H_{\text{HB}}, \text{kJ/mol}$ | $E_{\text{int}}, \text{kJ/mol}$ |
| O-H28...O23                                                                                                 | 1.724                                   | 28.6                                   | 36.0                            |
| O-H22...O26                                                                                                 | 1.847                                   | 23.1                                   | 27.6                            |
| O-H24...O5                                                                                                  | 1.978                                   | 18.8                                   | 22.0                            |
| O-H25...O19                                                                                                 | 1.990                                   | 18.4                                   | 21.6                            |
| O-H21...O5                                                                                                  | 2.040                                   | 17.1                                   | 18.5                            |
| C-H12...O20                                                                                                 | 2.282                                   | 12.1                                   | 12.4                            |
| C-H2...O20                                                                                                  | 2.471                                   | 9.5                                    | 9.8                             |
| C-H12...O26                                                                                                 | 2.914                                   | 5.8                                    | 4.7                             |
| Total enthalpy/energy, kJ/mol                                                                               |                                         | 133.4                                  | 152.6                           |

| Local minimum structure GB_3H2O_2 ( $E = -631.416654/-631.632636/-\mathbf{631.330693}$ a.u.) <sup>a)</sup> |                                         |                                        |                                 |
|------------------------------------------------------------------------------------------------------------|-----------------------------------------|----------------------------------------|---------------------------------|
| Fragment                                                                                                   | $R(\text{H}\cdots\text{O}), \text{\AA}$ | $-\Delta H_{\text{HB}}, \text{kJ/mol}$ | $E_{\text{int}}, \text{kJ/mol}$ |
| O-H24...O2                                                                                                 | 1.764                                   | 26.6                                   | 32.4                            |
| O-H27...O3                                                                                                 | 1.789                                   | 25.5                                   | 30.6                            |
| O-H22...O3                                                                                                 | 2.091                                   | 15.9                                   | 17.8                            |
| O-H21...O2                                                                                                 | 2.179                                   | 14.0                                   | 15.6                            |
| C-H13...O23                                                                                                | 2.206                                   | 13.5                                   | 14.1                            |
| C-H18...O23                                                                                                | 2.269                                   | 12.3                                   | 13.2                            |
| C-H19...O26                                                                                                | 2.323                                   | 11.9                                   | 12.3                            |
| C-H11...O26                                                                                                | 2.311                                   | 11.7                                   | 11.7                            |
| C-H12...O20                                                                                                | 2.298                                   | 11.5                                   | 11.4                            |
| Total enthalpy/energy, kJ/mol                                                                              |                                         | 142.9                                  | 159.1                           |

| Local minimum structure GB_3H2O_3 ( $E = -631.418208/-631.631206/-\mathbf{631.325752}$ a.u.) <sup>a)</sup> |                                         |                                        |                                 |
|------------------------------------------------------------------------------------------------------------|-----------------------------------------|----------------------------------------|---------------------------------|
| Fragment                                                                                                   | $R(\text{H}\cdots\text{O}), \text{\AA}$ | $-\Delta H_{\text{HB}}, \text{kJ/mol}$ | $E_{\text{int}}, \text{kJ/mol}$ |
| O-H21...O5                                                                                                 | 1.697                                   | 30.0                                   | 37.3                            |
| O-H24...O26                                                                                                | 1.858                                   | 23.2                                   | 27.3                            |
| O-H28...O19                                                                                                | 1.846                                   | 22.7                                   | 26.6                            |
| O-H27...O20                                                                                                | 1.979                                   | 18.7                                   | 21.6                            |
| C-H13...O23                                                                                                | 1.989                                   | 18.5                                   | 21.2                            |
| O-H25...O20                                                                                                | 2.040                                   | 17.1                                   | 18.9                            |
| Total enthalpy/energy, kJ/mol                                                                              |                                         | 130.2                                  | 152.8                           |

<sup>a)</sup> See Figs. 2 and S3.

<sup>b)</sup> Sum of electronic and zero-point energies computed at the B3LYP/6-31G\*\* level. Energies computed at the B3LYP/6-311++G\*\* level are given by script and at the wB97XD/aug-cc-pVDZ level highlighted in bold.



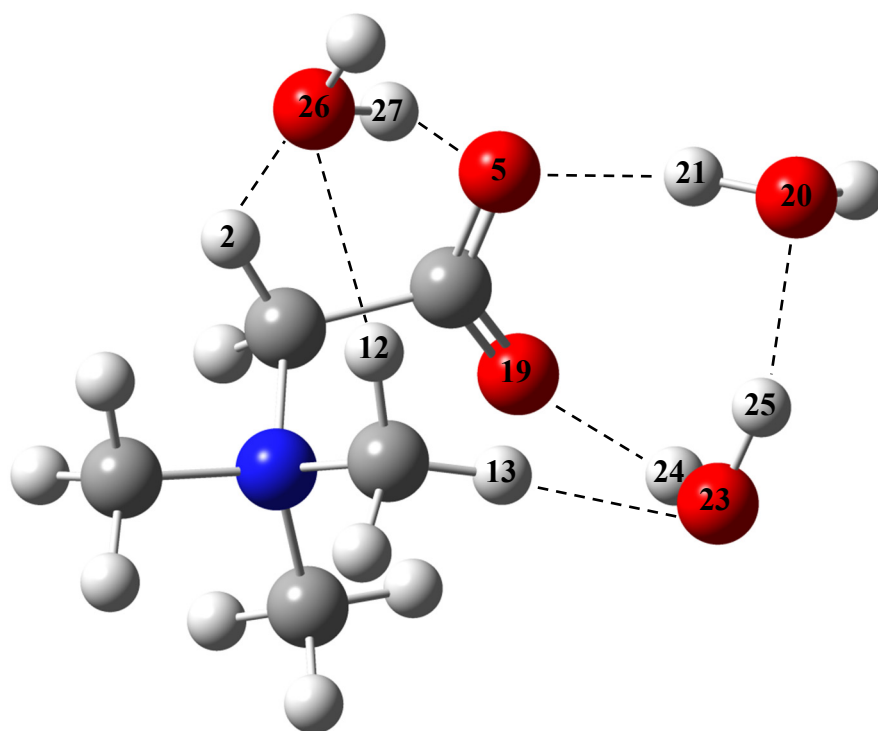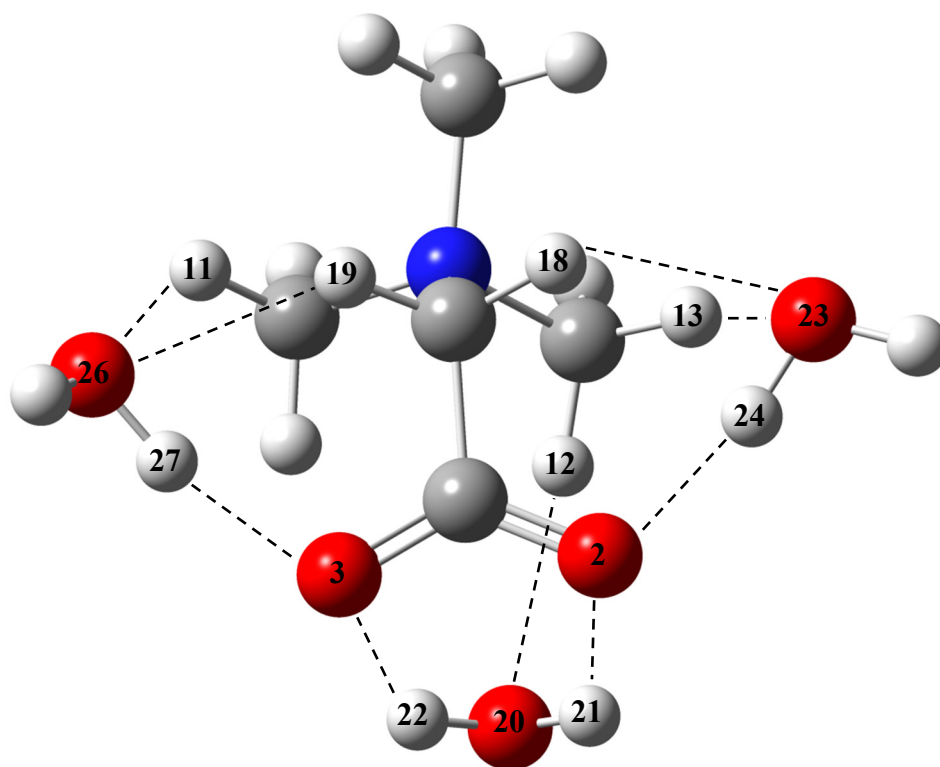

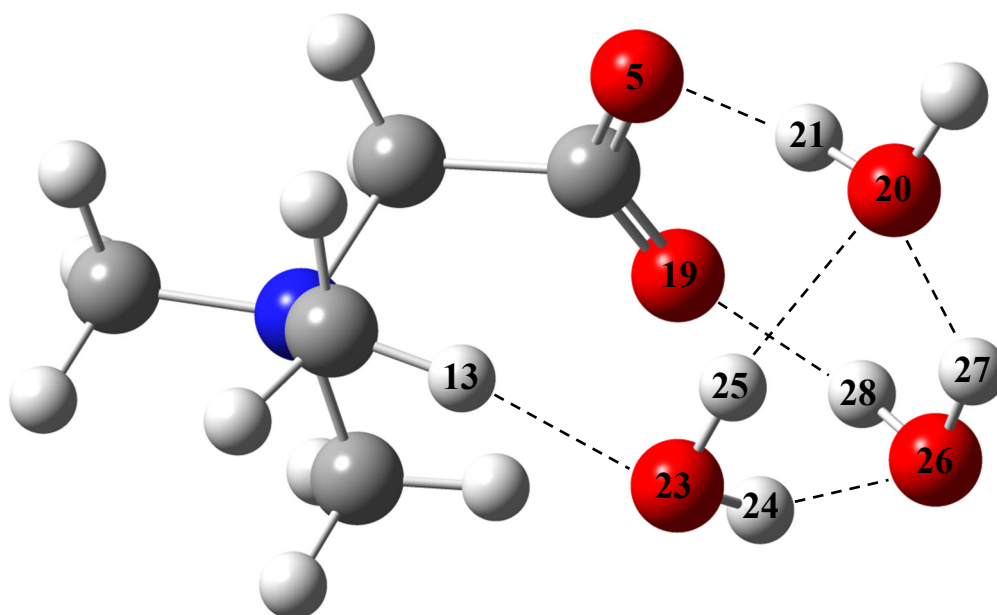

**Figure S3.** The local-minimum structures  $\text{GB}\cdot(\text{H}_2\text{O})_3$  complexes: GB\_3H2O (upper panel), GB\_3H2O\_2 (middle panel), GB\_3H2O\_3 (lower panel). H-bonds are given by dotted lines.

**Table S5.** H $\cdots$ O distances  $R(\text{H}\cdots\text{O})$  in structures of GB $\cdot(\text{H}_2\text{O})_4$  complexes <sup>a)</sup>, calculated using B3LYP/6-31G\*\* and intermolecular H-bond enthalpy/energy, computed using Eqs. (1) and (2).

| Local minimum structure GB 4H <sub>2</sub> O ( $E = -707.835826/-708.083623/-$ <b>707.744189</b> a.u.) |                                 |                                  |                           |
|--------------------------------------------------------------------------------------------------------|---------------------------------|----------------------------------|---------------------------|
| Fragment                                                                                               | $R(\text{H}\cdots\text{O})$ , Å | $-\Delta H_{\text{HB}}$ , kJ/mol | $E_{\text{int}}$ , kJ/mol |
| O-H21...O5                                                                                             | 1.782                           | 25.8                             | 30.5                      |
| O-H27...O5                                                                                             | 1.792                           | 25.4                             | 30.3                      |
| O-H30...O19                                                                                            | 1.807                           | 24.7                             | 29.3                      |
| O-H25...O20                                                                                            | 1.884                           | 21.8                             | 25.9                      |
| O-H24...O19                                                                                            | 2.000                           | 18.1                             | 20.3                      |
| C-H12...O26                                                                                            | 2.214                           | 13.3                             | 14.1                      |
| C-H3...O29                                                                                             | 2.303                           | 11.8                             | 12.7                      |
| C-H2...O26                                                                                             | 2.296                           | 11.9                             | 12.3                      |
| C-H17...O29                                                                                            | 2.284                           | 12.1                             | 12.1                      |
| C-H13...O23                                                                                            | 2.324                           | 11.5                             | 11.2                      |
| C-H16...O23                                                                                            | 2.398                           | 10.4                             | 9.4                       |
| Total enthalpy/energy, kJ/mol                                                                          |                                 | 186.8                            | 208.1                     |

| Global minimum structure GB 4H <sub>2</sub> O 2 ( $E = -707.836233/-708.083771/-$ <b>707.742706</b> a.u.) <sup>a)</sup> |                                 |                                  |                           |
|-------------------------------------------------------------------------------------------------------------------------|---------------------------------|----------------------------------|---------------------------|
| Fragment                                                                                                                | $R(\text{H}\cdots\text{O})$ , Å | $-\Delta H_{\text{HB}}$ , kJ/mol | $E_{\text{int}}$ , kJ/mol |
| O-H27...O5                                                                                                              | 1.789                           | 25.5                             | 30.5                      |
| O-H25...O20                                                                                                             | 1.827                           | 23.9                             | 29.3                      |
| O-H22...O29                                                                                                             | 1.913                           | 21.9                             | 24.5                      |
| O-H30...O19                                                                                                             | 1.881                           | 20.8                             | 24.3                      |
| O-H21...O5                                                                                                              | 1.942                           | 19.9                             | 21.6                      |
| O-H24...O19                                                                                                             | 2.002                           | 18.1                             | 20.1                      |
| C-H13...O23                                                                                                             | 2.126                           | 15.1                             | 16.2                      |
| C-H12...O26                                                                                                             | 2.222                           | 13.2                             | 13.8                      |
| C-H2...O26                                                                                                              | 2.244                           | 12.8                             | 13.8                      |
| Total enthalpy/energy, kJ/mol                                                                                           |                                 | 171.2                            | 194.1                     |

<sup>a)</sup> See Figs. 2 and S4.

<sup>b)</sup> Sum of electronic and zero-point energies computed at the B3LYP/6-31G\*\* level. Energies computed at the B3LYP/6-311++G\*\* level are given by script and at the wB97XD/aug-cc-pVDZ level highlighted in bold.

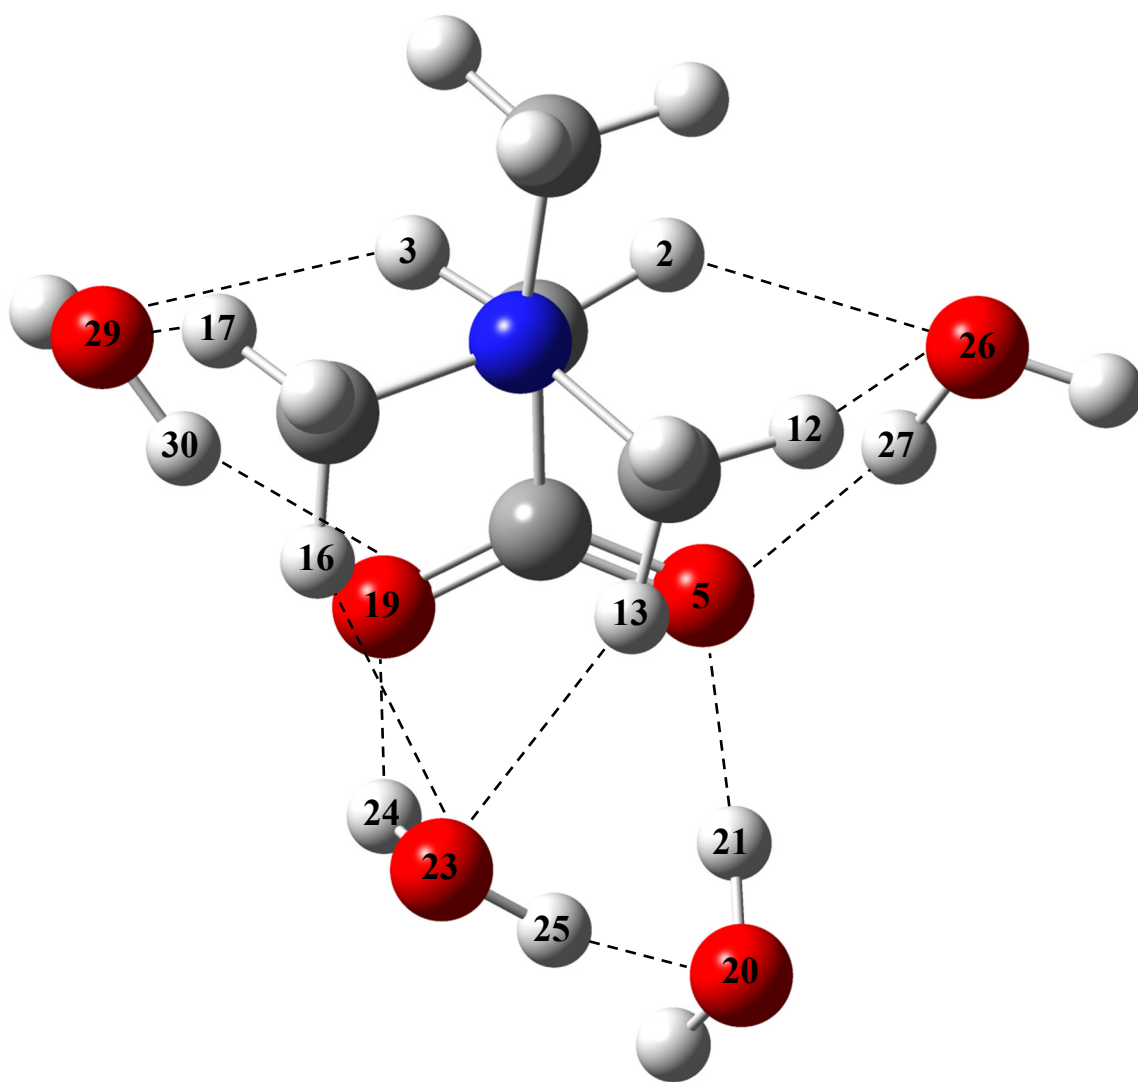

**Figure S4.** The local-minimum structure  $\text{GB}\cdot(\text{H}_2\text{O})_4$  complex GB\_4H2O\_2. H-bonds are given by dotted lines.

**Table S6.** Intermolecular H-bond energies  $E_{int}$  in GB dimer evaluated using Eq. (2).

| Fragment <sup>a)</sup> | $E_{int}$ , kJ/mol |                    |
|------------------------|--------------------|--------------------|
|                        | B3LYP/6-31G**      | wB97XD/aug-cc-pVDZ |
| C-H36...O2             | 8.8                | 9.9                |
| C-H32...O2             | 13.1               | 10.6               |
| C-H37...O2             | 16.6               | 14.8               |
| H19-H37                | 6.9                | 7.4                |
| C-H19...O21            | 16.6               | 14.7               |
| C-H11...O21            | 13.1               | 10.6               |
| C-H15...O21            | 8.8                | 9.9                |
| Total energy, kJ/mol   | 83.9               | 77.9               |

<sup>a)</sup> See Fig. 4.

**Table S7.** Intermolecular H-bond energies  $E_{int}$ , in GB crystalline hydrate computed using Eq. (2).

| Fragment <sup>a)</sup> | $E_{int}$ , kJ/mol |                |
|------------------------|--------------------|----------------|
|                        | B3LYP/6-31G**      | PBE-D3/6-31G** |
| Water-GB interactions  |                    |                |
| O-H12...O1             | 42.0               | 43.3           |
| O-H13...O2             | 45.2               | 45.8           |
| C-H2...O3              | 13.3               | 13.5           |
| C-H3...O3              | 7.8                | 7.9            |
| C-H4...O3              | 12.9               | 12.3           |
| C-H9...O3              | 7.3                | 7.3            |
| C-H8...O3              | 8.7                | 8.6            |
| C-H7...O3              | 8.1                | 8.2            |
| C-H11...O3             | 22.6               | 23.1           |
| C-H1...O3              | 3.4                | 3.4            |
| Total energy, kJ/mol   | 171.3              | 173.4          |
| GB-GB interactions     |                    |                |
| C-H10...O1             | 15.5               | 15.5           |
| C-H3...O1              | 17.0               | 17.1           |
| C-H9...O1              | 13.1               | 13.1           |
| C-H5...O1              | 7.8                | 8.1            |
| C-H7...O1              | 9.0                | 9.2            |
| C-H6...O1              | 7.2                | 7.2            |
| C-H6...O2              | 16.6               | 16.7           |
| C-H10...O2             | 15.3               | 15.8           |
| C-H7...O2              | 9.3                | -              |
| C-H8...O2              | 6.9                | 6.9            |
| H2-H5                  | 6.8                | 6.9            |
| H1-H5                  | 8.6                | 8.6            |
| H2-H2                  | 3.8                | 3.8            |
| H4-H9                  | 7.6                | 7.5            |
| H8-H8                  | 3.8                | 3.9            |
| H6-H11                 | 7.4                | 7.4            |
| Total energy, kJ/mol   | 155.7              | 147.7          |

<sup>a)</sup> the numbering of atoms is shown on Figure 5
